# Supplementary material
Source: PubMed Central journal article supplement (PMC10186205)
Supplement: jamaneurol-e231168-s001.pdf [file jamaneurol-e231168-s001.pdf]

## Supplemental Online Content

Goldman SM, Weaver FM, Stroupe KT, et al. Risk of Parkinson disease among service members at Marine Corps Base Camp Lejeune. *JAMA Neurol*. Published online May 15, 2023. doi:10.1001/jamaneurol.2023.1168

**eTable 1.** Neurodegenerative Parkinsonism Diagnostic Codes

**eTable 2.** Prodromal Feature Diagnostic Codes

**eTable 3.** Prodromal Feature Frequencies and Likelihood Ratios (LRs)

**eTable 4.** Full ATSDR Cohort Characteristics

**eTable 5.** Characteristics of Those With VHA and/or Medicare Usage (in Current Study)

**eTable 6.** Characteristics of Those Without VHA or Medicare Usage (Not in Current Study)

**eTable 7.** Prodromal Risk Score Associations With Camp in Persons Without PD or Other Neurodegenerative Parkinsonism

This supplemental material has been provided by the authors to give readers additional information about their work.

**eTable 1. Neurodegenerative Parkinsonism Diagnostic Codes**

|                                              | <b>ICD9</b> |                                                            | <b>ICD10</b> |
|----------------------------------------------|-------------|------------------------------------------------------------|--------------|
| Parkinson's disease (PD)                     | 332.0       | PD                                                         | G20          |
| Corticobasal degeneration (CBD)              | 331.6       | Pantothenate kinase-associated neurodegeneration           | G23.0        |
| Dementia with Lewy bodies (DLB)              | 331.82      | Progressive supranuclear palsy (PSP)                       | G23.1        |
| Other degenerative diseases of basal ganglia | 333.0       | Striatonigral degeneration (MSA)                           | G23.2        |
|                                              |             | Other degenerative diseases of basal ganglia (specified)   | G23.8        |
|                                              |             | Other degenerative diseases of basal ganglia (unspecified) | G23.9        |
|                                              |             | DLB                                                        | G31.83       |
|                                              |             | CBD                                                        | G31.85       |
|                                              |             | Multiple system atrophy (MSA)                              | G90.3        |

**eTable 2. Prodromal Feature Diagnostic Codes**

|                                  | ICD9                                                                                                                     |                                                                                                                                                                                                                                                                                                                                                                                                                                                                    | ICD10                                                   |                                                                                                                                                             |
|----------------------------------|--------------------------------------------------------------------------------------------------------------------------|--------------------------------------------------------------------------------------------------------------------------------------------------------------------------------------------------------------------------------------------------------------------------------------------------------------------------------------------------------------------------------------------------------------------------------------------------------------------|---------------------------------------------------------|-------------------------------------------------------------------------------------------------------------------------------------------------------------|
| <b>RBD</b>                       | 327.42                                                                                                                   | RBD                                                                                                                                                                                                                                                                                                                                                                                                                                                                | G47.52                                                  | RBD                                                                                                                                                         |
| <b>Constipation</b>              | 560.32<br>564.00<br>564.01<br>564.09                                                                                     | Fecal impaction<br>Constipation, unspecified<br>Slow transit constipation<br>Other constipation                                                                                                                                                                                                                                                                                                                                                                    | K56.41<br>K58.1<br>K59.00<br>K59.01<br>K59.04<br>K59.09 | Fecal impaction<br>IBS with constipation<br>Constipation, unspecified<br>Slow transit constipation<br>Chronic idiopathic constipation<br>Other constipation |
| <b>Olfactory impairment</b>      | 781.1                                                                                                                    | Disturbances of sensation of smell and taste                                                                                                                                                                                                                                                                                                                                                                                                                       | R43.0<br>R43.1<br>R43.2<br>R43.8<br>R43.9               | Anosmia<br>Parosmia<br>parageusia<br>other disturbances of smell and taste<br>unspecified disturbances of smell and taste                                   |
| <b>Depression</b>                | 296.0x<br>296.1x<br>296.2x<br>296.3x<br>296.4x<br>296.5x<br>296.6x<br>296.7<br>296.8x<br>296.9x<br>300.4<br>309.x<br>311 | Bipolar 1 single episode<br>Manic disorder, recurrent<br>Major depressive episode<br>Major depressive disorder, recurrent<br>Bipolar 1 most recent episode, manic<br>Bipolar 1 most recent episode, depressed<br>Bipolar 1 most recent episode, mixed<br>Bipolar 1 most recent episode, unspecified<br>Other bipolar disorders<br>Unspecified episodic mood disorder<br>Dysthymic disorder<br>Adjustment disorders<br>Depressive disorder not elsewhere classified | F30.x<br>F31.x<br>F32.x<br>F33.x<br>F43.2x              | Manic episode<br>Bipolar disorder<br>Depressive episode<br>Depressive disorder, recurrent<br>Adjustment disorders                                           |
| <b>Anxiety</b>                   | 300.0x<br>300.2x                                                                                                         | Anxiety states<br>Phobic disorders                                                                                                                                                                                                                                                                                                                                                                                                                                 | F40.x<br>F41.x                                          | Phobic anxiety disorders<br>Other anxiety disorders                                                                                                         |
| <b>Tremor</b>                    | 333.1<br>781.0                                                                                                           | Essential tremor<br>Abnormal involuntary movements                                                                                                                                                                                                                                                                                                                                                                                                                 | G25.0<br>G25.1<br>G25.2                                 | Essential tremor<br>Tremor unspecified<br>Other specified forms of tremor                                                                                   |
| <b>Erectile dysfunction (ED)</b> | 607.84                                                                                                                   | Impotence of organic origin                                                                                                                                                                                                                                                                                                                                                                                                                                        | N52.0x<br>N52.1<br>N52.8<br>N52.9                       | Vasculogenic ED<br>ED due to diseases classified elsewhere<br>Other male ED<br>Male ED unspecified                                                          |
| <b>Urinary dysfunction</b>       | 788.2<br>788.21<br>788.29                                                                                                | Retention of urine<br>bladder incomplete emptying<br>retention of urine specified                                                                                                                                                                                                                                                                                                                                                                                  | N31.x<br>N39.3<br>N39.4x                                | Neuromuscular dysfunction of bladder<br>Stress incontinence<br>Other specified incontinence                                                                 |

|                              |                            |                                                                      |                         |                                                                                        |
|------------------------------|----------------------------|----------------------------------------------------------------------|-------------------------|----------------------------------------------------------------------------------------|
|                              | 788.3x<br>788.62<br>788.63 | Urinary incontinence<br>Urgency<br>Hesitancy                         |                         |                                                                                        |
| <b>Seborrheic dermatitis</b> | 690.1<br>690.11<br>706.3   | Seborrheic dermatitis, unspecified<br>Seborrhea capitis<br>Seborrhea | L21.0<br>L21.8<br>L21.9 | Seborrhea capitis<br>Other seborrheic dermatitis<br>Seborrheic dermatitis, unspecified |

RBD = REM sleep behavior disorder, IBS = irritable bowel syndrome

**eTable 3. Prodromal Feature Frequencies and Likelihood Ratios (LRs)**

| Feature               | PD (n=430)   | No PD or neurodegenerative parkinsonism (N=157,637) | Internal LR+ | Internal LR- | MDS LR+ <sup>1</sup> | MDS LR- |
|-----------------------|--------------|-----------------------------------------------------|--------------|--------------|----------------------|---------|
| RBD                   | 48 (11.16%)  | 134 (0.085%)                                        | 129          | na           | 130                  | na      |
| Olfactory impairment  | 10 (2.33%)   | 686 (0.44%)                                         | 5.34         | na           | 6.4                  | na      |
| Constipation          | 134 (31.16%) | 15,860 (10.06%)                                     | 3.1          | 0.77         | 2.5                  | 0.82    |
| Depression            | 273 (63.49%) | 68,974 (43.75%)                                     | 1.45         | 0.65         | 1.6                  | 0.88    |
| Anxiety               | 222 (51.63%) | 48,149 (30.54)                                      | 1.69         | 0.70         | na                   | na      |
| Tremor                | 101 (23.49%) | 2,318 (1.47%)                                       | 16           | na           | 9.6                  | na      |
| Erectile dysfunction  | 134 (31.16%) | 32,424 (20.57%)                                     | 1.52         | 0.87         | 3.4                  | 0.87    |
| Urinary dysfunction   | 77 (17.91%)  | 8,699 (5.52%)                                       | 3.24         | na           | 2.0                  | na      |
| Seborrheic dermatitis | 38 (8.64%)   | 5,771 (3.66%)                                       | 2.41         | na           | na                   | na      |

na = not-applicable; RBD = REM sleep behavior disorder; PD = Parkinson's disease; LR = likelihood ratio; MDS = Movement Disorders Society

### References

1. Heinzel S, Berg D, Gasser T, et al. Update of the MDS research criteria for prodromal Parkinson's disease. *Mov Disord*. 2019;34(10):1464-1470.

**eTable 4. Full ATSDR Cohort Characteristics**

| Variable                                                 | Lejeune          | Pendleton        | Total            |
|----------------------------------------------------------|------------------|------------------|------------------|
| <b>Full ATSDR Cohort Characteristics</b>                 |                  |                  |                  |
| Total n                                                  | 172,128          | 168,361          | 340,489          |
| Mean Age at follow up (SD)                               | 58.30 (7.04)     | 58.41 (7.16)     | 58.36 (7.10)     |
| Proportion aged < 50                                     | 11,766 (6.84%)   | 11,981 (7.12%)   | 24,747 (6.97%)   |
| Proportion aged 50-59                                    | 75,099 (43.63%)  | 71,066 (42.21%)  | 146,165 (42.93%) |
| Proportion aged 60-69                                    | 84,147 (48.89%)  | 84,003 (49.89%)  | 168,615 (49.38%) |
| Proportion aged ≥ 70                                     | 1,116 (0.65%)    | 1,311 (0.78%)    | 2,427 (0.71%)    |
| Age when residence at Camp began<br>Mean years (SD)      | 19.77 (2.33)     | 20.01 (2.51)     | 19.89 (2.43)     |
| Female n (%)                                             | 8,627 (5.01%)    | 5,930 (3.52%)    | 4,557 (4.28%)    |
| Race n (%)                                               |                  |                  |                  |
| White                                                    | 127,483 (74.06%) | 130,980 (77.80%) | 258,463 (75.91%) |
| Black                                                    | 40,117 (23.31%)  | 28,647 (17.02%)  | 68,764 (20.20%)  |
| Other                                                    | 4,410 (2.56%)    | 8,453 (5.02%)    | 12,863 (3.78%)   |
| Rank % officers (vs. enlisted)                           | 6,574 (3.28%)    | 7,568 (4.50%)    | 14,142 (4.15%)   |
| Months lived on base during 1975-85,<br>Mean (SD)        | 23.45 (16.66)    | 21.40 (15.73)    | 22.44 (12.64)    |
| VHA usage n (% of total)                                 | 79,420 (46.14%)  | 67,356 (40.00%)  | 146,776 (43.11%) |
| Medicare usage n (% of total)                            |                  |                  |                  |
| VHA & Medicare                                           | 10,281 (5.97%)   | 8,003 (4.75%)    | 18,284           |
| Medicare only                                            | 5,404 (3.14%)    | 5,942 (3.53%)    | 11346            |
| VHA or Medicare usage n (% of total)                     | 84,824 (49.28%)  | 73,298 (43.54%)  | 158,122 (46.44%) |
| VHA or Medicare usage before<br>1/13/2017 n (% of total) | 75,650 (43.95%)  | 65,684 (39.01%)  | 141,334 (41.51%) |

ATSDR = Agency for Toxic Substances and Disease Registry; SD = standard deviation; VHA = Veterans Health Administration

**eTable 5. Characteristics of Those With VHA and/or Medicare Usage (in Current Study)**

| Variable                                            | Lejeune         | Pendleton       | Total           |
|-----------------------------------------------------|-----------------|-----------------|-----------------|
| VHA or Medicare usage n                             | 84,824          | 73,298          | 158,122         |
| Female n (%)                                        | 4,491 (5.29%)   | 2,811 (3.84%)   | 7,302 (4.62%)   |
| Race n (%)                                          |                 |                 |                 |
| White                                               | 57,331 (67.59%) | 52,082 (71.06%) | 109,413 (69.2%) |
| Black                                               | 25,196 (29.70%) | 17,141 (23.39%) | 42,337 (26.8%)  |
| Other                                               | 2,291 (2.70%)   | 4,050 (5.53%)   | 6,341 (4.0%)    |
| Hispanic ethnicity n (%)                            | 5,068 (5.97%)   | 6,904 (9.42%)   | 11,972 (7.6%)   |
| Deceased n (%)                                      | 1,600 (1.90%)   | 1,745 (2.38%)   | 3,345 (2.1%)    |
| Age at end of follow up                             |                 |                 |                 |
| Mean years (SD)                                     | 59.64 (4.43)    | 59.80 (4.62)    | 59.72 (4.52)    |
| Proportion aged < 50                                | 2,310 (2.72%)   | 2,287 (3.72%)   | 4,597 (2.91%)   |
| Proportion aged 50-59                               | 36,461 (42.98%) | 29,812 (40.67%) | 66,273 (41.91%) |
| Proportion aged 60-69                               | 45,310 (53.42%) | 40,368 (55.07%) | 85,678 (54.18%) |
| Proportion aged ≥ 70                                | 743 (0.88%)     | 832 (1.14%)     | 1,575 (1.00%)   |
| Age when residence at Camp began<br>Mean years (SD) | 19.89 (2.45)    | 20.18 (2.70)    | 20.03 (2.57)    |
| Months lived on base during 1975-85,<br>Mean (SD)   | 24.96 (17.41)   | 22.65 (16.58)   | 23.89 (17.07)   |
| Rank % officers (vs. enlisted)                      | 3.03%           | 3.82%           | 3.39%           |

SD = standard deviation; VHA = Veterans Health Administration

**eTable 6. Characteristics of Those Without VHA or Medicare Usage (Not in Current Study)**

| Variable                                            | Lejeune         | Pendleton       | Total            |
|-----------------------------------------------------|-----------------|-----------------|------------------|
| Total n without VHA or Medicare usage               | 87,304          | 95,063          | 182,367          |
| Female n (%)                                        | 4,136(4.74%)    | 3,119(3.28%)    | 7,255(3.98%)     |
| Race n (%)                                          |                 |                 |                  |
| White                                               | 70,167 (80.37%) | 78,931 (83.03%) | 149,098 (81.76%) |
| Black                                               | 14,921 (17.09%) | 11,507 (12.10%) | 26,428(14.49%)   |
| Other                                               | 2,145 (2.46%)   | 4,489(4.72%)    | 6,634 (3.64%)    |
| Hispanic ethnicity n (%)                            | n/a             | n/a             | a/a              |
| Deceased n (%)                                      | 8,587 (9.84%)   | 8,763 (9.22%)   | 17,350 (9.51%)   |
| Age at end of follow up                             |                 |                 |                  |
| Mean years (SD)                                     | 56.95 (8.68)    | 57.29 (8.48)    | 57.13 (8.53)     |
| Proportion aged < 50                                | 9,133 (10.48%)  | 9,300 (9.78%)   | 18,438 (10.11%)  |
| Proportion aged 50-59                               | 39,241 (44.95%) | 41,897 (44.07%) | 81,138 (44.49%)  |
| Proportion aged 60-69                               | 38,563 (44.17%) | 43,389 (45.64%) | 81,952 (44.94%)  |
| Proportion aged ≥ 70                                | 362 (0.41%)     | 477 (0.50%)     | 839 (0.46%)      |
| Age when residence at Camp began<br>Mean years (SD) | 19.65 (2.21)    | 19.87 (2.35)    | 19.77 (2.28)     |
| Months lived on base during 1975-85,<br>Mean (SD)   | 21.98 (15.77)   | 20.45 (14.98)   | 21.18 (15.37)    |
| Rank % officers (vs. enlisted)                      | 4,005 (4.59%)   | 4,769 (5.02%)   | 8,774 (4.81%)    |

SD = standard deviation; VHA = Veterans Health Administration

**eTable 7. Prodromal Risk Score Associations With Camp in Persons Without PD or Other Neurodegenerative Parkinsonism**

| <b>Model<sup>a</sup></b>                          |                   |                       |                |
|---------------------------------------------------|-------------------|-----------------------|----------------|
| <b>Multiple Linear Regression</b>                 | <b>Lejeune b</b>  | <b>Standard Error</b> | <b>p-value</b> |
| <b>Internal-Prodromal risk score<sup>b</sup></b>  |                   |                       |                |
| Overall                                           | 0.034             | 0.006                 | <0.001         |
| Men only                                          | 0.033             | 0.0062                | <0.001         |
| Men only, adjusted for VHA usage duration         | 0.0375            | 0.0057                | <0.001         |
| <b>MDS-Prodromal risk score<sup>c</sup></b>       |                   |                       |                |
| Overall                                           | 0.032             | 0.0048                | <0.001         |
| Men only                                          | 0.032             | 0.0049                | <0.001         |
| Men only, adjusted for VHA usage duration         | 0.035             | 0.0046                | <0.001         |
|                                                   |                   |                       |                |
| <b>Logistic Regression dichotomized at 99%ile</b> | <b>Lejeune OR</b> | <b>95%CI</b>          | <b>p-value</b> |
| <b>Internal-Prodromal risk score</b>              |                   |                       |                |
| Men only (n=1397 ≥99%ile)                         | 1.14              | 1.02-1.27             | 0.02           |
| Men only, adjusted for VHA usage duration         | 1.16              | 1.04-1.29             | 0.007          |
| Women only (n=104 ≥99%ile)                        | 1.15              | 0.78-1.72             | 0.48           |
| <b>MDS-Prodromal risk score</b>                   |                   |                       |                |
| Men only                                          | 1.17              | 1.05-1.31             | 0.005          |
| Men only, adjusted for VHA usage duration         | 1.20              | 1.07-1.34             | 0.002          |
| Women only                                        | 1.33              | 0.78-2.27             | 0.30           |

<sup>a</sup>All models include age, sex (as applicable), race, ethnicity; <sup>b</sup>Prodromal risk score using internally derived likelihood ratios; <sup>c</sup>Prodromal risk score using MDS likelihood ratios

PD = Parkinson’s disease; MDS = Movement Disorders Society; OR = odds ratio; CI = confidence interval; VHA = Veterans Health Administration
