# Supplementary material
Source: PubMed Central journal article supplement (PMC10186205)
Supplement: jamaneurol-e231168-s002.pdf [file jamaneurol-e231168-s002.pdf]

## Data Sharing Statement

Goldman. Risk of Parkinson Disease Among Service Members at Marine Corps Base Camp Lejeune. *JAMA Neurol*. Published May 15, 2023. doi:10.1001/jamaneurol.2023.1168

### Data

**Data available:** No

### Additional Information

**Explanation for why data not available:** Data access is regulated by the Department of Veterans Affairs.
